# Supplementary material
Source: publisher figshare collection journal article supplement (https://acs.figshare.com/ndownloader/files/8286863)
Supplement: Supplementary file 1 [file 8286863]

## Sheet: Increased Serotonin
Gene Ontology term	Category: Amine-related (A), Forebrain/Development (F),	Cluster frequency	Genome frequency	Corrected	FDR	FALSE	Genes annotated to the term
	Apoptosis/Cell Death (N), Vague (V)			P-value		Positives
cellular amine metabolic process	A	11 of 35 genes, 31.4%	67 of 24182 genes, 0.3%	1.67e-17	0	0	SNCA, Park2, TDO2, Mecp2, MAOB, Atp7a, HTR1A, MAOA, NR4A2, Slc6a3, Park7
amine metabolic process	A	11 of 35 genes, 31.4%	74 of 24182 genes, 0.3%	5.42e-17	0	0	SNCA, Park2, TDO2, Mecp2, MAOB, Atp7a, HTR1A, MAOA, NR4A2, Slc6a3, Park7
dopamine metabolic process	A	9 of 35 genes, 25.7%	38 of 24182 genes, 0.2%	1.95e-15	0	0	SNCA, Park2, MAOB, Atp7a, HTR1A, MAOA, NR4A2, Park7, Slc6a3
monoamine transport	A	10 of 35 genes, 28.6%	85 of 24182 genes, 0.4%	3.87e-14	0	0	SNCA, Nos1, Cnr1, Park2, Mecp2, MAOB, HTR1A, RTN4, Slc6a3, Park7
catecholamine metabolic process	A	9 of 35 genes, 25.7%	54 of 24182 genes, 0.2%	6.28e-14	0	0	SNCA, Park2, MAOB, Atp7a, HTR1A, MAOA, NR4A2, Park7, Slc6a3
catechol-containing compound metabolic process	A	9 of 35 genes, 25.7%	54 of 24182 genes, 0.2%	6.28e-14	0	0	SNCA, Park2, MAOB, Atp7a, HTR1A, MAOA, NR4A2, Park7, Slc6a3
phenol-containing compound metabolic process	A	10 of 35 genes, 28.6%	98 of 24182 genes, 0.4%	1.71e-13	0	0	SNCA, Park2, MAOB, Atp7a, HTR1A, MAOA, NR4A2, Slc6a3, Park7, KCNJ6
regulation of dopamine metabolic process	A	7 of 35 genes, 20.0%	19 of 24182 genes, 0.1%	4.75e-13	0	0	SNCA, HTR1A, Park2, NR4A2, Slc6a3, MAOB, Park7
regulation of catecholamine metabolic process	A	7 of 35 genes, 20.0%	20 of 24182 genes, 0.1%	7.3e-13	0	0	SNCA, HTR1A, Park2, NR4A2, Slc6a3, MAOB, Park7
organic hydroxy compound transport	A	11 of 35 genes, 31.4%	201 of 24182 genes, 0.8%	4.73e-12	0	0	SNCA, Nos1, Cnr1, Park2, Lep, Mecp2, MAOB, HTR1A, RTN4, Slc6a3, Park7
organic hydroxy compound metabolic process	A	13 of 35 genes, 37.1%	411 of 24182 genes, 1.7%	1.17e-11	0	0	SNCA, Park2, Lep, Mecp2, MAOB, Atp7a, DHCR7, HTR1A, MAOA, NR4A2, Slc6a3,Park7, KCNJ6
ammonium ion metabolic process	A	10 of 35 genes, 28.6%	153 of 24182 genes, 0.6%	1.66e-11	0	0	SNCA, Park2, Mecp2, MAOB, Atp7a, HTR1A, MAOA, NR4A2, Slc6a3, Park7
regulation of cellular amine metabolic process	A	7 of 35 genes, 20.0%	30 of 24182 genes, 0.1%	1.89e-11	0	0	SNCA, HTR1A, Park2, NR4A2, Slc6a3, MAOB, Park7
ammonium transport	A	9 of 35 genes, 25.7%	100 of 24182 genes, 0.4%	2.15e-11	0	0	SNCA, Nos1, Cnr1, Park2, MAOB, HTR1A, RTN4, Park7, Slc6a3
organonitrogen compound metabolic process	A	19 of 35 genes, 54.3%	1911 of 24182 genes, 7.9%	1.68e-09	0	0	SNCA, Mecp2, MAOB, Atp7a, Gpx1, HMOX1, Slc6a3, Park7, Ucn2, Nos1, LRRK2,Park2, TDO2, Ucn, TAT, HTR1A, MAOA, NR4A2, KCNJ6
	Number of total genes in category	23					SNCA, Mecp2, MAOB, Atp7a, Gpx1, HMOX1, Slc6a3, Park7, Ucn2, Nos1, LRRK2,Park2, TDO2, Ucn, TAT, HTR1A, MAOA, NR4A2, KCNJ6, CNR1, RTN4, LEP, DHCR7
regulation of neuron death	N	14 of 35 genes, 40.0%	318 of 24182 genes, 1.3%	8.55e-15	0	0	SNCA, Nos1, LRRK2, Park2, Mecp2, Atp7a, Ucn, Gpx1, Pitx3, NR4A2, HMOX1, Cdk5r1,Park7, EN2
neuron death	N	14 of 35 genes, 40.0%	352 of 24182 genes, 1.5%	3.54e-14	0	0	SNCA, Nos1, LRRK2, Park2, Mecp2, Atp7a, Ucn, Gpx1, Pitx3, NR4A2, HMOX1, Cdk5r1,Park7, EN2
regulation of neuron apoptotic process	N	11 of 35 genes, 31.4%	239 of 24182 genes, 1.0%	3.21e-11	0	0	SNCA, Park2, Mecp2, Atp7a, Gpx1, NR4A2, Pitx3, HMOX1, Cdk5r1, Park7, EN2
neuron apoptotic process	N	11 of 35 genes, 31.4%	261 of 24182 genes, 1.1%	8.46e-11	0	0	SNCA, Park2, Mecp2, Atp7a, Gpx1, NR4A2, Pitx3, HMOX1, Cdk5r1, Park7, EN2
negative regulation of neuron death	N	10 of 35 genes, 28.6%	212 of 24182 genes, 0.9%	4.47e-10	0	0	SNCA, LRRK2, Park2, Mecp2, Atp7a, Ucn, NR4A2, HMOX1, Park7, EN2
regulation of apoptotic process	N	17 of 35 genes, 48.6%	1369 of 24182 genes, 5.7%	1.33e-09	0	0	TGFA, SNCA, Lep, Mecp2, Atp7a, Gpx1, HMOX1, Cdk5r1, Park7, Nos1, Cnr1, LRRK2,Park2, Ucn, NR4A2, Pitx3, EN2
regulation of programmed cell death	N	17 of 35 genes, 48.6%	1385 of 24182 genes, 5.7%	1.6e-09	0	0	TGFA, SNCA, Lep, Mecp2, Atp7a, Gpx1, HMOX1, Cdk5r1, Park7, Nos1, Cnr1, LRRK2,Park2, Ucn, NR4A2, Pitx3, EN2
response to oxidative stress	N	11 of 35 genes, 31.4%	346 of 24182 genes, 1.4%	1.83e-09	0	0	SNCA, LRRK2, Park2, TACR1, Atp7a, Ucn, TAT, Gpx1, NR4A2, HMOX1, Park7
	Number of total genes in category	19					TGFA, SNCA, Lep, Mecp2, Atp7a, Gpx1, HMOX1, Cdk5r1, Park7, Nos1, Cnr1, LRRK2,Park2, Ucn, NR4A2, Pitx3, EN2, TACR1, TAT
behavior	V	16 of 35 genes, 45.7%	665 of 24182 genes, 2.7%	3.04e-13	0	0	SNCA, Nos1, LRRK2, Cnr1, CACNA1B, Park2, Lep, TACR1, Mecp2, Atp7a, Ucn,HTR1A, Pitx3, NR4A2, Slc6a3, Park7
single-organism transport	V	22 of 35 genes, 62.9%	2458 of 24182 genes, 10.2%	7.08e-11	0	0	SNCA, Lep, TACR1, Mecp2, MAOB, Atp7a, RTN4, HMOX1, Slc6a3, Cdk5r1, Park7,Ucn2, Ube3a, Nos1, CACNA1B, Cnr1, LRRK2, Park2, Ucn, HTR1A, Slc6a8, KCNJ6
secretion	V	16 of 35 genes, 45.7%	1027 of 24182 genes, 4.2%	2.58e-10	0	0	SNCA, Lep, TACR1, Mecp2, MAOB, RTN4, HMOX1, Slc6a3, Nos1, Ucn2, CACNA1B,Cnr1, LRRK2, Park2, Ucn, HTR1A
regulation of secretion by cell	V	14 of 35 genes, 40.0%	677 of 24182 genes, 2.8%	2.91e-10	0	0	Ucn2, SNCA, Nos1, LRRK2, Cnr1, CACNA1B, Park2, Lep, TACR1, MAOB, Ucn,HTR1A, RTN4, HMOX1
single-organism localization	V	22 of 35 genes, 62.9%	2676 of 24182 genes, 11.1%	4.08e-10	0	0	SNCA, Lep, TACR1, Mecp2, MAOB, Atp7a, RTN4, HMOX1, Slc6a3, Cdk5r1, Park7,Ucn2, Ube3a, Nos1, CACNA1B, Cnr1, LRRK2, Park2, Ucn, HTR1A, Slc6a8, KCNJ6
secretion by cell	V	15 of 35 genes, 42.9%	898 of 24182 genes, 3.7%	6.92e-10	0	0	Ucn2, SNCA, Nos1, LRRK2, Cnr1, CACNA1B, Park2, Lep, TACR1, Mecp2, MAOB, Ucn,HTR1A, RTN4, HMOX1
regulation of secretion	V	14 of 35 genes, 40.0%	728 of 24182 genes, 3.0%	7.8e-10	0	0	Ucn2, SNCA, Nos1, LRRK2, Cnr1, CACNA1B, Park2, Lep, TACR1, MAOB, Ucn,HTR1A, RTN4, HMOX1
locomotory behavior	V	10 of 35 genes, 28.6%	244 of 24182 genes, 1.0%	1.82e-09	0	0	SNCA, LRRK2, CACNA1B, Park2, Mecp2, Atp7a, NR4A2, Pitx3, Slc6a3, Park7
	Number of total genes in category	24					SNCA, Lep, TACR1, Mecp2, MAOB, Atp7a, RTN4, HMOX1, Slc6a3, Cdk5r1, Park7,Ucn2, Ube3a, Nos1, CACNA1B, Cnr1, LRRK2, Park2, Ucn, HTR1A, Slc6a8, KCNJ6, PITX3, NR4A2

## Sheet: Decreased Serotonin
Gene Ontology term	Category: Amine-related (A), Forebrain/Development (F),	Cluster frequency	Genome frequency	Corrected	FDR	FALSE	Genes annotated to the term
	Apoptosis/Cell Death(N), Vague (V)			P-value		Positives
cellular amine metabolic process	A	6 of 31 genes, 19.4%	67 of 24182 genes, 0.3%	2.7e-07	0	0	SNCA, IDO1, NR4A2, MECP2, HPRT1, Tph2
amine metabolic process	A	6 of 31 genes, 19.4%	74 of 24182 genes, 0.3%	4.98e-07	0	0	SNCA, IDO1, NR4A2, MECP2, HPRT1, Tph2
organic hydroxy compound metabolic process	A	9 of 31 genes, 29.0%	411 of 24182 genes, 1.7%	1.69e-06	0	0	SNCA, PTEN, APP, MECP2, HPRT1, HTT, NR4A2, Tph2, Sod1
	Number of total genes in category	10					SNCA, IDO1, NR4A2, MECP2, HPRT1, Tph2, PTEN, APP, HTT, Sod1
learning or memory	F	10 of 31 genes, 32.3%	250 of 24182 genes, 1.0%	4.59e-10	0	0	PTEN, APP, MECP2, Lmx1b, PSEN1, HTT, Slc6a4, Esr2, Gria1, BDNF
cognition	F	10 of 31 genes, 32.3%	279 of 24182 genes, 1.2%	1.37e-09	0	0	PTEN, APP, MECP2, Lmx1b, PSEN1, HTT, Slc6a4, Esr2, Gria1, BDNF
brain development	F	12 of 31 genes, 38.7%	576 of 24182 genes, 2.4%	2.99e-09	0	0	PTEN, PEX13, APP, MECP2, Lmx1b, HPRT1, PSEN1, HTT, Slc6a4, Esr2, NR4A2, EN2
generation of neurons	F	16 of 31 genes, 51.6%	1480 of 24182 genes, 6.1%	4.82e-09	0	0	APP, MECP2, Lmx1b, Adra2c, Fev, HPRT1, PSEN1, HTT, Slc6a4, Esr2, Sod1, PEX13,PTEN, NR4A2, BDNF, EN2
head development	F	12 of 31 genes, 38.7%	621 of 24182 genes, 2.6%	7.2e-09	0	0	PTEN, PEX13, APP, MECP2, Lmx1b, HPRT1, PSEN1, HTT, Slc6a4, Esr2, NR4A2, EN2
neurogenesis	F	16 of 31 genes, 51.6%	1578 of 24182 genes, 6.5%	1.27e-08	0	0	APP, MECP2, Lmx1b, Adra2c, Fev, HPRT1, PSEN1, HTT, Slc6a4, Esr2, Sod1, PEX13,PTEN, NR4A2, BDNF, EN2
central nervous system development	F	12 of 31 genes, 38.7%	793 of 24182 genes, 3.3%	1.22e-07	0	0	PTEN, PEX13, APP, MECP2, Lmx1b, HPRT1, PSEN1, HTT, Slc6a4, Esr2, NR4A2, EN2
neuron differentiation	F	14 of 31 genes, 45.2%	1335 of 24182 genes, 5.5%	2.68e-07	0	0	PTEN, APP, MECP2, Lmx1b, Adra2c, Fev, HPRT1, PSEN1, HTT, Slc6a4, NR4A2,BDNF, Sod1, EN2
nervous system development	F	16 of 31 genes, 51.6%	2095 of 24182 genes, 8.7%	8.73e-07	0	0	APP, MECP2, Lmx1b, Adra2c, Fev, HPRT1, PSEN1, HTT, Slc6a4, Esr2, Sod1, PEX13,PTEN, NR4A2, BDNF, EN2
	Number of total genes in category	17					PTEN, APP, MECP2, Lmx1b, PSEN1, HTT, Slc6a4, Esr2, Gria1, BDNF, PEX13, HPRT1, NR4A2, EN2, ADRA2C, FEV, SOD1
neuron apoptotic process	N	10 of 31 genes, 32.3%	261 of 24182 genes, 1.1%	7.06e-10	0	0	SNCA, APP, MECP2, PSEN1, HTT, Esr2, NR4A2, BDNF, Sod1, EN2
negative regulation of neuron death	N	9 of 31 genes, 29.0%	212 of 24182 genes, 0.9%	4.73e-09	0	0	SNCA, MECP2, PSEN1, HTT, Esr2, NR4A2, BDNF, EN2, Sod1
neuron death	N	10 of 31 genes, 32.3%	352 of 24182 genes, 1.5%	1.36e-08	0	0	SNCA, APP, MECP2, PSEN1, HTT, Esr2, NR4A2, BDNF, Sod1, EN2
regulation of neuron apoptotic process	N	9 of 31 genes, 29.0%	239 of 24182 genes, 1.0%	1.39e-08	0	0	SNCA, MECP2, PSEN1, HTT, Esr2, NR4A2, BDNF, EN2, Sod1
negative regulation of neuron apoptotic process	N	8 of 31 genes, 25.8%	160 of 24182 genes, 0.7%	2.29e-08	0	0	SNCA, MECP2, PSEN1, HTT, NR4A2, BDNF, EN2, Sod1
regulation of neuron death	N	9 of 31 genes, 29.0%	318 of 24182 genes, 1.3%	1.76e-07	0	0	SNCA, MECP2, PSEN1, HTT, Esr2, NR4A2, BDNF, EN2, Sod1
	Number of total genes in category	10					SNCA, APP, MECP2, PSEN1, HTT, Esr2, NR4A2, BDNF, Sod1, EN2
behavior	V	18 of 31 genes, 58.1%	665 of 24182 genes, 2.7%	1.02e-17	0	0	SNCA, APP, MECP2, Lmx1b, HPRT1, PSEN1, HTT, Slc6a4, Esr2, Celf6, IDO1, Sod1,CACNA1B, PEX13, PTEN, Gria1, NR4A2, BDNF
locomotory behavior	V	12 of 31 genes, 38.7%	244 of 24182 genes, 1.0%	1.08e-13	0	0	SNCA, CACNA1B, PTEN, PEX13, APP, MECP2, Lmx1b, HPRT1, HTT, IDO1, NR4A2,Sod1
single-organism behavior	V	14 of 31 genes, 45.2%	476 of 24182 genes, 2.0%	2.28e-13	0	0	SNCA, PTEN, APP, MECP2, Lmx1b, HPRT1, PSEN1, HTT, Slc6a4, Esr2, Celf6,NR4A2, Gria1, BDNF
multicellular organismal response to stress	V	7 of 31 genes, 22.6%	90 of 24182 genes, 0.4%	2.05e-08	0	0	Esr2, CACNA1B, PTEN, IDO1, NR4A2, MECP2, BDNF
chemical synaptic transmission	V	11 of 31 genes, 35.5%	568 of 24182 genes, 2.3%	6.49e-08	0	0	SNCA, PLAT, CACNA1B, PTEN, MECP2, GABRA1, PSEN1, HTT, Slc6a4, Gria1,BDNF
anterograde trans-synaptic signaling	V	11 of 31 genes, 35.5%	568 of 24182 genes, 2.3%	6.49e-08	0	0	SNCA, PLAT, CACNA1B, PTEN, MECP2, GABRA1, PSEN1, HTT, Slc6a4, Gria1,BDNF
synaptic signaling	V	11 of 31 genes, 35.5%	568 of 24182 genes, 2.3%	6.49e-08	0	0	SNCA, PLAT, CACNA1B, PTEN, MECP2, GABRA1, PSEN1, HTT, Slc6a4, Gria1,BDNF
trans-synaptic signaling	V	11 of 31 genes, 35.5%	568 of 24182 genes, 2.3%	6.49e-08	0	0	SNCA, PLAT, CACNA1B, PTEN, MECP2, GABRA1, PSEN1, HTT, Slc6a4, Gria1,BDNF
modulation of synaptic transmission	V	9 of 31 genes, 29.0%	326 of 24182 genes, 1.3%	2.2e-07	0	0	SNCA, CACNA1B, PTEN, MECP2, PSEN1, HTT, Slc6a4, Gria1, BDNF
multi-organism behavior	V	6 of 31 genes, 19.4%	66 of 24182 genes, 0.3%	2.46e-07	0	0	Slc6a4, PTEN, PEX13, APP, MECP2, HTT
regulation of membrane potential	V	9 of 31 genes, 29.0%	376 of 24182 genes, 1.6%	7.75e-07	0	0	SNCA, CACNA1B, PTEN, MECP2, PSEN1, HTT, Gria1, BDNF, Sod1
neuron-neuron synaptic transmission	V	7 of 31 genes, 22.6%	156 of 24182 genes, 0.6%	1e-06	0	0	SNCA, Slc6a4, PLAT, PTEN, GABRA1, BDNF, PSEN1
regulation of synaptic plasticity	V	7 of 31 genes, 22.6%	168 of 24182 genes, 0.7%	1.69e-06	0	0	SNCA, PTEN, Gria1, MECP2, BDNF, PSEN1, HTT
	Number of total genes in category	20					SNCA, APP, MECP2, Lmx1b, HPRT1, PSEN1, HTT, Slc6a4, Esr2, Celf6, IDO1, Sod1,CACNA1B, PEX13, PTEN, Gria1, NR4A2, BDNF, PLAT, GABRA1,
